# Supplementary material
Source: PubMed Central journal article supplement (PMC3070294)
Supplement: NIHMS272136-supplement-Appendix.pdf [file NIHMS272136-supplement-Appendix.pdf]

## APPENDIX

### Members of the Nonalcoholic Steatohepatitis Clinical Research Network (NASH CRN):

#### *Clinical Centers*

**Baylor College of Medicine, Houston, TX:** Stephanie Abrams, MD; Diana Arceo, MD, MS; Denise Espinosa; Leanel Angeli Fairly, RN.

#### **Case Western Reserve University Clinical Centers:**

- **MetroHealth Medical Center, Cleveland, OH:** Carol Hawkins, RN; Yao-Chang Liu, MD; Margaret Stager, MD.
- **Cleveland Clinic Foundation, Cleveland, OH:** Arthur McCullough, MD; Srinivasan Dasarathy, MD; Ruth Sargent, LPN.

**Seattle Children's Hospital and Research Institute, WA:** Melissa Coffey; Karen Murray, MD; Melissa Young.

**Children's National Medical Center, Washington, DC:** Parvathi Mohan, MD; Kavita Nair.

**Duke University Medical Center, Durham, NC:** Manal Abdelmalek, MD; Anna Mae Diehl, MD; Marcia Gottfried, MD (2004–2008); Cynthia Guy, MD; Paul Killenberg, MD (2004–2008); Samantha Kwan; Yi-Ping Pan; Dawn Piercy, FNP; Melissa Smith.

**Indiana University School of Medicine, Indianapolis, IN:** Prajakta Bhimalli; Naga Chalasani, MD; Oscar W. Cummings, MD; Lydia Lee, Linda Ragozzino, Raj Vuppalanchi, MD.

- **Riley Hospital for Children, Indianapolis, IN:** Elizabeth Byam; Ann Klipsch, RN; Jean Molleston, MD; Girish Subbarao, MD.

**Johns Hopkins Hospital, Baltimore, MD:** Kimberly Pfeifer; Ann Scheimann, MD; Michael Torbenson, MD.

**St Louis University, St Louis, MO:** Sarah Barlow, MD (2002–2007); Jose Derdoy, MD (2007–); Joyce Hoffmann; Debra King, RN; Andrea Morris; Joan Siegner, RN; Susan Stewart, RN; Brent A. Tetri, MD; Judy Thompson, RN.

**University of California San Diego, San Diego, CA:** Cynthia Behling, MD, PhD; Lisa Clark, PhD, MPH; Janis Durelle; Tarek Hassanein, MD; Joel E. Lavine, MD, PhD; Susana Mendoza; Jeffrey B. Schwimmer, MD; Claude Sirlin, MD; Tanya Stein, MD; Zobeida Palomares.

**University of California San Francisco, San Francisco, CA:** Bradley Aouizerat, PhD; Kiran Bambha, MD; Nathan M. Bass, MD, PhD; Linda D. Ferrell, MD; Danuta Filipowski, MD; Raphael Merriman, MD (2002–2007); Mark Pabst; Monique Rosenthal; Philip Rosenthal, MD; Tessa Steel (2006–2008).

**University of Washington Medical Center, Seattle, WA:** Matthew Yeh, MD, PhD.

**Virginia Commonwealth University, Richmond, VA:** Sherry Boyett, RN; Melissa J. Contos, MD; Michael Fuchs, MD; Amy Jones; Velimir AC Luketic, MD; Bimaljit Sandhu, MD; Arun J. Sanyal, MD; Carol Sargeant, RN, MPH; Kimberly Selph; Melanie White, RN.

**Virginia Mason Medical Center, Seattle, WA:** Kris V. Kowdley, MD; Jody Mooney, MS; James Nelson, PhD; Sarah Ackermann; Cheryl Saunders, MPH; Vy Trinh; Chia Wang, MD.

**Washington University, St Louis, MO:** Elizabeth M. Brunt, MD.

#### *Resource centers*

**National Cancer Institute, Bethesda, MD:** David Kleiner, MD, PhD.

**National Institute of Child Health and Human Development, Bethesda, MD:** Gilman D. Grave, MD; Terry T.K. Huang, PhD, MPH.

**National Institute of Diabetes, Digestive and Kidney Diseases, Bethesda, MD:** Edward Doo, MD; James Everhart, MD, MPH; Jay Hoofnagle, MD; Patricia R. Robuck, PhD, MPH (Project Scientist); Leonard Seeff, MD.

**Johns Hopkins University, Bloomberg School of Public Health (Data Coordinating Center), Baltimore, MD:** Patricia Belt, BS; Frederick L. Brancati, MD, MHS; Jeanne M. Clark, MD, MPH; Ryan Colvin, MPH; Michele Donithan, MHS; Mika Green, MA; Rosemary Hollick (2003–2005); Milana Isaacson; Wana Kim; Alison Lydecker, MPH (2006–2008), Pamela Mann, MPH; Laura Miriel; Alice Sternberg, ScM; James Tonascia, PhD; Aynur Ünalp-Arida, MD, PhD; Mark Van Natta, MHS; Laura Wilson, ScM; Katherine Yates, ScM.
